# Supplementary material for: Reduced-Cost Construction of Jacobian Matrices for High-Resolution Inversions of Satellite Observations of Atmospheric Composition
Source: Copernicus journal article supplement (doi:10.5194/amt-2020-451), 2020-11-16
Supplement: Supplementary file [file amt-2020-451-AC1-supplement.pdf]

## **Responses to Reviewer 1**

We thank the reviewers for their comments and questions. Our responses are formatted as follows:

*The reviewer's comment/question (numbered) is written in black italic text.*

Our responses are written in normal black text (indented).

The revised text as it appears in the manuscript is written in normal blue text (indented), with relevant changes underlined.

Line numbers refer to the edited manuscript. We have also provided a tracked-changes document, but that has different line numbers.

*This is a well written paper. Nonetheless, there does not seem to be so much added value compared to previous publications on this topic. However, this is a nice illustration of this difficult set of ideas (reduction of the control space) and, which, to me, is very welcome and useful. Among possible improvements, I would list:*

- *Although it is rather fair as it is, the bibliography and references should be given more attention, be more complete and ultimately improved. Several key references that predate those cited in the manuscript, should be mentioned first.*
- *A couple of algorithms (in a proper algorithmic environment – typically a pseudocode) could be provided for both methods described in the manuscript.*
- *Because this work's objective is the improvement in efficiency and to decrease the inversion's computational cost, the use of parallelism and modern computer architecture should be discussed.*

*Overall, I believe the manuscript only requires minor revisions but that they should be very carefully addressed.*

Thank you for these comments. We responded to these points in the individual responses below.

*1. l.14: "be orders of magnitude lower than its coverage suggests": Although I fully agree with the authors, the phrasing seems a bit excessive.*

We changed “orders of magnitude” to “significantly.”

The information content of satellite data may be much lower than its coverage would suggest.... (L15 – L16)

*2. l.42: "The solution is generally obtained by minimizing a Bayesian cost function...": Rigorously speaking, there is no such thing as a "Bayesian cost function"; I would suggest: "The solution is generally obtained in a Bayesian framework by minimizing a cost function..." for instance.*

Thanks for this suggestion; we've changed the text per your suggestion.

The solution is generally obtained in a Bayesian framework by minimizing a cost function.... (L44 – L45)

*3. l.46: "Methods of estimating the error exist (Bousserez and Henze, 2018; Evensen, 2009), but these approaches are computationally expensive, incomplete, and rarely applied in practice.": there are many earlier papers dealing with errors, including posterior errors, with objective estimation. For instance, among our own contributions: Koohkan and Bocquet (2012); Koohkan et al. (2013).*

Thanks for this comment. We added a reference to Chevallier et al. (2007), Meirink et al. (2008), and Koohkan et al. (2013). We did not find a description of posterior error estimation in Koohkan and Bocquet (2012).

Methods of estimating the error exist ([e.g. Chevallier et al., 2007](#); [Meirink et al., 2008](#); [Koohkan et al., 2013](#)), but these approaches are computationally expensive, incomplete, and rarely applied in practice. (L49 – L50)

4. l.81-82: "*Bocquet et al. (2011) defined a method to find the optimal multiscale grid from an array of all allowable grids, but this requires a large computational investment.*": ok, agreed, but solutions had been proposed (and tested with success!) in the companion paper (*Bocquet and Wu, 2011*), see for instance Section 3.

Thanks for your comment. We now cite *Bayesian Design of Control Space Part I and Part II* and more accurately describe the computational needs and optimality criteria of the methods proposed in those works.

[Bocquet et al. \(2011\)](#) and [Bocquet and Wu \(2011\)](#) defined a method to select a multiscale grid from a limited array of allowable grids that preserve resolution where the observations have the highest information content. (L87 – L89)

5. l.84-87: "*were subjective and did not consider the information content of the forward model or the observations. Reduced-rank methods (Bousserez and Henze, 2018; Spantini et al., 2015) generate an approximation of the posterior solution at the original dimension  $n$  by solving the inversion in the directions of highest information content. Spantini et al. (2015) assumed knowledge of the Jacobian matrix.*": Absolutely but so does Bocquet et al. (2011), albeit in the physical space rather in a spectral space.

See our response to comment 4.

6. l.78-89: *There are other key papers in reduction methods applied to source inverse modelling in atmospheric chemistry that should be mentioned. Those are based on reversible-jump MCMCs. I can think of Lunt et al. (2016); Liu et al. (2017).*

Thank you for your comment. We have added a citation to Rigby et al. (2011), Thompson and Stohl (2014), Ray et al. (2015), Lunt et al. (2016), and Liu et al. (2017).

[Other approaches that decreased the dimension of the state vector assumed knowledge of the Jacobian matrix \(e.g., Rigby et al., 2011; Thompson and Stohl, 2014; Ray et al., 2015; Lunt et al., 2016; Liu et al., 2017\).](#) (L91 – L93)

7. l.91: "*that minimize*"  $\rightarrow$  "*that minimizes*"

We write "Here we present two methods ... that maximize the information content." We believe this is correct grammar, but we have modified the sentence for clarity.

Here we present two methods to construct the Jacobian matrix for a native  $n$ -dimensional state vector and maximize the information content of the inverse analysis using  $k < n$  forward model simulations. (L99 – L100)

8. *The introduction is concise but very well written. However, the references chosen in the introduction mostly refer to the authors' works. I am fine with additionally citing your own papers and recent/fresh contributions to the field, but you should at least cite the seminal or key papers for each main idea. For instance: l. 44- 45: "This minimum is typically found using a numerical (variational) method, often employing the adjoint of the CTM to compute the cost function gradient (Henze et al., 2007)." : Citing Henze et al. (2007) is fine assuming you do not forget typically earlier works such as Elbern and Schmidt (2001); Quélo et al. (2005) and studies by Greg Carmichael et al.*

Thank you for this comment. We added a citation to Daescu et al. (2000), Elbern and Schmidt (2001), and Quélo et al. (2005) to the Henze et al. (2007) citation. We also added citations to other works as described in comments 3 and 6.

[This minimum is typically found using a numerical \(variational\) method, often employing the adjoint of the CTM to compute the cost function gradient \(e.g., Daescu et al., 2000; Elbern and Schmidt, 2001; Quélo et al., 2005; Henze et al., 2007\).](#) (L46 – L48)

9. *l.101: "of Jacobian matrix construction." → "of the Jacobian matrix construction."*

Changed.

[This section presents the reduced-dimension and reduced-rank methods of constructing the Jacobian matrix.](#) (L109)

10. *l.107: the notation ( $A$  lower index) for the prior is very confusing, since in the literature it very often points to the Analysis, i.e. the posterior. I understand that this is the one used by Clive Rodgers (Rodgers, 2000) or in the 1D retrieval community, but this is not the one used by the large majority. Moreover, it is also conflicting with the dedicated notation  $A$  for the averaging kernel (which does not refer to the prior but to the posterior). I would strongly suggest to change notation to make the manuscript easier and less confusing to read.*

Thank you for this comment. While we recognize the benefits of the other notation commonly used in inversion discussions, we follow the notation of Rodgers (2000) and other analytical inversions that optimize methane emissions (i.e. Zhang et al. (2021), Maasakkers et al. (2021, 2019), Sheng et al. (2018), Fraser et al. (2014), etc.) for the sake of consistency and comparability.

11. *l.116: Same issue with  $K$  which is universally used as the Kalman gain matrix (Kalman, 1960), including in the geophysical inverse problems and data assimilation literature.*

See our response to comment 10.

12. *l.120; Equations (2, 3): you forgot the punctuation of the equations. Please check the whole manuscript and its equations.*

Thank you for catching this. We corrected this mistake by adding a comma to the end of equation (2) and a period to the end of equation (3). We also added commas to the end of equations (5), (7), (11), and (12).

13. l.172-175: *"We will refer to the rate at which the information content accumulates as the number of eigenvectors increases as the information content spectrum." : More simply put, the spectrum is the ordered list of the eigenvalues.*

Thanks for this suggestion. We've modified the language.

We will refer to the [ordered list of the eigenvalues](#) as the information content spectrum. (L181 – L182)

14. l.229-231: *I understood the point on clustering. Yet, it seems a bit vague to me. You could be more specific.*

Thanks for this comment. We've clarified the details of this method in an algorithm, per your suggestion in comment 16.

15. l.240-242: *Again, this passage is not so clear and could be improved, although I guess I roughly understood.*

See our response to comment 14.

16. Sections 2.4 and 2.5: *I believe you could/should add a pseudo-code to each algorithm. The text is rather (though not entirely) clear and adding an algorithm would really help/reassure the reader. Obviously, these are the key sections of the manuscript, so that it's worth investing time and (manuscript) space in such algorithms.*

Thank you for this suggestion. We've provided algorithms (below) describing the two methods (we didn't underline these additions for the sake of readability). We also added references to these algorithms to the text.

We apply this approach beginning with our initial estimate  $\mathbf{K}^{(0)}$  (Section 2.3) in a two-step update that iteratively improves the multiscale grid. [Algorithm 1 describes this process in detail.](#) (L245 – L246)

#### **Algorithm 1: Reduced-dimension Jacobian matrix construction**

Given a native-resolution state vector with dimension  $n$ , a state vector encompassing the entire domain with dimension  $n_{\text{RD}} = 1$ , and  $\mathbf{A}^{(0)}$  and  $\mathbf{A}_{\text{RD}}^{(0)}$  the  $n \times n$  and  $1 \times 1$  initial estimates of the averaging kernel matrix, respectively, and an initial cluster size of one native-resolution grid cell:

1: Add the  $J$  clusters with the highest diagonal values of  $\mathbf{A}^{(0)}$  to the state vector and update its dimension  $n_{\text{RD}} = n_{\text{RD}} + J$ ;

2: Perturb in the forward model those  $J$  clusters and the background cluster to generate the  $m \times n_{\text{RD}}$  reduced-dimension Jacobian matrix  $\mathbf{K}_{\text{RD}}^{(1)}$  and the corresponding  $n_{\text{RD}} \times n_{\text{RD}}$  averaging kernel matrix  $\mathbf{A}_{\text{RD}}^{(1)}$ ;

3: If the difference in DOFS per cluster  $\Delta\text{DPC} = \frac{\text{Tr}(\mathbf{A}_{\text{RD}}^{(1)})}{n_{\text{RD}}} - \frac{\text{Tr}(\mathbf{A}_{\text{RD}}^{(0)})}{n_{\text{RD}} - J} < \varepsilon$ , where  $\varepsilon$  is a set threshold, increase the cluster size (e.g., by aggregating together non-allocated, native-resolution grid cells using K-means clustering);

4: Let  $\mathbf{A}_{\text{RD}}^{(0)} = \mathbf{A}_{\text{RD}}^{(1)}$  and repeat steps 1 to 4 until all native-resolution grid cells are allocated to the state vector;

5: Disaggregate the clusters with the largest increase in the diagonal values from  $\mathbf{A}^{(0)}$  to  $\mathbf{A}_{\text{RD}}^{(1)}$  as measured on the multiscale grid and update the state vector dimension  $n_{\text{RD}}$ ;

6: Perturb in the forward model the disaggregated grid cells to generate the final  $m \times n_{\text{RD}}$  reduced-dimension Jacobian matrix  $\mathbf{K}_{\text{RD}}^{(2)}$ .

(L255 – L267)

In an inverse system without a known Jacobian matrix, the reduced-rank Jacobian matrix approximation can be constructed in a two-step update that iteratively improves the patterns of information content used as perturbations. [Algorithm 2 describes this process in detail.](#) (L288 – L290)

### Algorithm 2: Reduced-rank Jacobian matrix construction

Given a native-resolution state vector with dimension  $n$ ,  $\mathbf{A}^{(0)}$  an  $n \times n$  initial estimate of the averaging kernel matrix, and  $\mathbf{S}_A$  the  $n \times n$  prior error covariance matrix:

1: Complete the eigendecomposition of the  $n \times n$  matrix  $\mathbf{Q}^{(0)} = \mathbf{S}_A^{-1/2} \mathbf{A}^{(0)} \mathbf{S}_A^{1/2} = \mathbf{W}^{(0)} \mathbf{\Sigma}^{(0)} \mathbf{W}^{(0)\text{T}}$ ;

2: Select  $k$  so that  $1 - \frac{\text{Tr}(\mathbf{\Sigma}_k^{(0)})}{\text{Tr}(\mathbf{\Sigma}^{(0)})} < \varepsilon$  where  $\mathbf{\Sigma}_k^{(0)}$  is the  $k \times k$  subset of  $\mathbf{\Sigma}^{(0)}$  containing the largest diagonal values and  $\varepsilon$  is a set threshold; or, select  $k$  so that the  $k$ th eigenvector has

a signal-to-noise ratio  $\text{SNR}_k = \sqrt{\frac{\sigma_k^{(0)}}{1 - \sigma_k^{(0)}}} > \sim 1$ , where  $\sigma_k^{(0)}$  is the  $k$ th largest diagonal value of  $\mathbf{\Sigma}^{(0)}$ ;

3: Form the  $n \times k$  matrix  $\mathbf{\Gamma}^{*(0)} = \mathbf{S}_A^{1/2} \mathbf{W}_k^{(0)}$  where  $\mathbf{W}_k^{(0)}$  is a matrix of the first  $k$  columns of  $\mathbf{W}^{(0)}$  as ranked by the diagonal values of  $\mathbf{\Sigma}^{(0)}$ ;

4: Perturb in the forward model the columns of  $\mathbf{\Gamma}^{*(0)}$  to generate the  $m \times k$  reduced-dimension Jacobian matrix  $\mathbf{K}_\omega^{(1)}$ ;

5: Form the  $m \times n$  reduced-rank Jacobian matrix  $\mathbf{K}_\Pi^{(1)} = \mathbf{K}_\omega^{(1)} \mathbf{\Gamma}^{(0)}$ , where  $\mathbf{\Gamma}^{(0)} = \mathbf{W}_k^{(0)\text{T}} \mathbf{S}_A^{-1/2}$ , and the corresponding  $n \times n$  reduced-rank averaging kernel matrix  $\mathbf{A}_\Pi^{(1)}$ ;

6: Let  $\mathbf{A}^{(0)} = \mathbf{A}_\Pi^{(1)}$  and repeat steps 1 to 5 to generate the final  $m \times n$  reduced-rank Jacobian matrix  $\mathbf{K}_\Pi^{(2)}$ .

(L305 – L316)

17. I.261: *This was first proposed and proven in Bocquet et al. (2011), section 2.4.*

Thank you for this comment. We added a reference to Bocquet et al. (2011).

[Bousserez and Henze \(2018\)](#), following [Bocquet et al. \(2011\)](#), show that the reduced-dimension Jacobian matrix  $\mathbf{K}_\omega$  is given by  $\mathbf{K}_\omega = \mathbf{K}\Gamma^*$  and the reduced-rank Jacobian matrix  $\mathbf{K}_\Pi$  by  $\mathbf{K}_\Pi = \mathbf{K}\Pi = \mathbf{K}\Gamma^*\Gamma$ . (L284 – L285)

18. I.337-344: *The results for the reduced-dimension solution are somehow underwhelming; the resulting DOFS are quite low. Do you have a explanation for this? Or did I miss something?*

Thank you for this question. We found and fixed a problem with how we calculated the error covariance at reduced-dimension, which increased the DOFS slightly. We've also clarified the dependence of DOFS on the dimension of the state vector.

The reduced-dimension solution generates fewer DOFS ([95](#)) than the native-resolution solution ([198](#)) because the DOFS depend on the dimension of the state vector. When comparing the DOFS per cluster, a dimension-independent measure, the reduced-dimension solution generates more than twice the value of the native-resolution solution ([0.22](#) compared to [0.09](#)), reflecting the consolidation of information content. (L383 – L386)

19. *You did not discuss at all the impact of time as you considered a static mesh for the emission. Can you discuss briefly the approximation that such assumption entails?*

Thanks for asking. We clarified that these methods can be applied to temporally-resolved state vectors in the introduction to the methods section.

For the purposes of illustration, we take the state vector to be a gridded field of [static emissions](#), but the methods apply to [temporally variable emissions and more generally to any state vector](#). (L113 – L114)

20. *You did not discuss the patterns provided by the eigenvectors (main modes of the DOFS). Is it worth discussing this point?*

Thanks for asking. As you note, the eigenvectors are the main modes of the DOFS. As a result, we find that the leading eigenvectors show little information that is not expressed in the averaging kernel sensitivities. As a result, we discuss the averaging kernel sensitivities directly rather than providing a separate discussion of the patterns.

21. I.425-426: *You might want to have a look at solutions proposed in the meteorological data assimilation community to efficiently compute the Jacobian in high dimension, for instance Frolov et al. (2018).*

Thank you for this recommendation. We looked through the work of Frolov and Bishop and believe that the ensemble-based approaches are not applicable to the case considered here, which assumes the use of a deterministic chemical transport model.

*22. I believe you should discuss parallelism of your algorithms and codes. Your paper is targeted at more efficient techniques – which will also depend on how well you are able to exploit parallelism. Please add a thorough discussion on the subject.*

Thank you for this comment. We added statements detailing the parallelization used in each method and comparing the parallelization potential of each method.

[The resulting multiscale grid] has dimension 434 and the corresponding reduced-dimension Jacobian matrix  $\mathbf{K}_{RD}^{(2)}$  required 446 forward model simulations across 17 parallelized batches... (L371 – L373)

The resulting Jacobian matrix  $\mathbf{K}_{\Pi}^{(2)}$  has rank  $\approx 431$  and required 522 forward model simulations across two parallelized batches. (L397 – L398)

The reduced-dimension and reduced-rank methods reproduce the native-resolution inversion with a factor of at least four reduction in total computational cost. The reduced-dimension method generates lower DOFS but higher DOFS per state vector element due to the clustering of grid cells. The resulting posterior solution is exact on the multiscale grid and provides better spatial coverage than the reduced-rank method at lower resolution. The reduced-rank method generates a higher-DOFS, higher-resolution approximation where the averaging kernel sensitivities are large. While the calculation of large Jacobian matrices can take advantage of parallel computing environments (Maasackers et al., 2019), the iterative nature of both methods proposed here puts some limit on parallelization. The limit is greater for the reduced-dimension method, which requires an iteration for each cluster size added to the state vector. The reduced-rank method requires only two iterations. In both cases, these limitations may not be meaningful because the native-resolution Jacobian matrix is rarely generated in a fully parallel environment in practice. (L453 – L462)
